# Supplementary material for: New Copper Complexes with Antibacterial and Cytotoxic Activity
Source: MDPI journal article supplement (doi:10.3390/ijms241813819), 2023-09-07
Supplement: s1 [file s1]

## Supplementary material

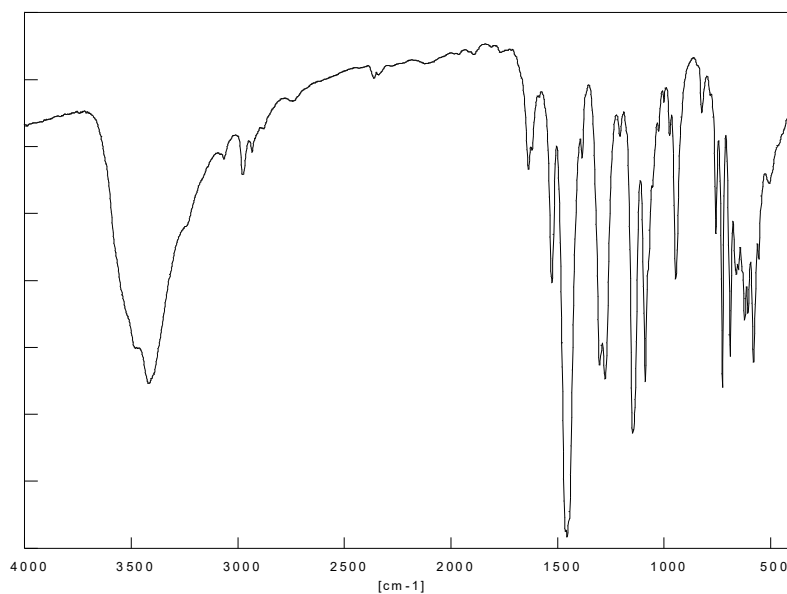

**Figure S1.** IR spectrum of the C1 complex.

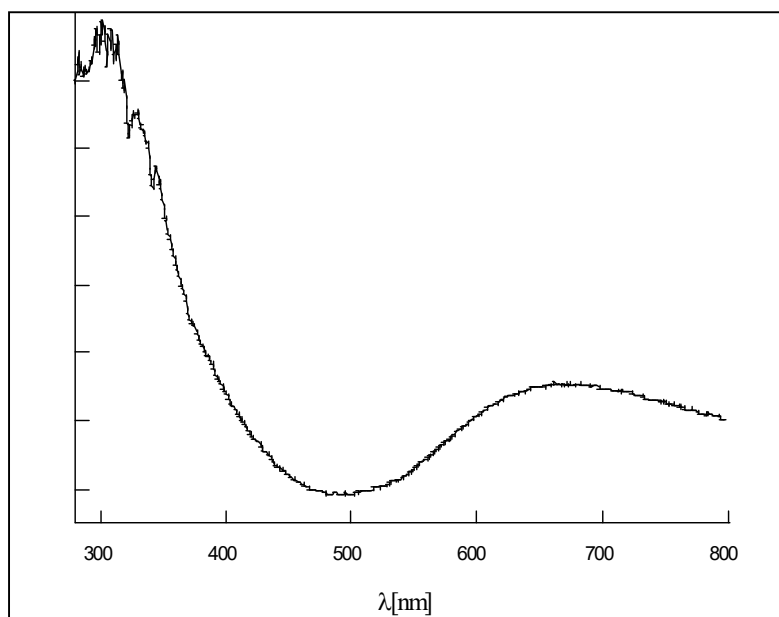

**Figure S2.** Diffuse UV-Vis reflection spectrum of the C1 complex.

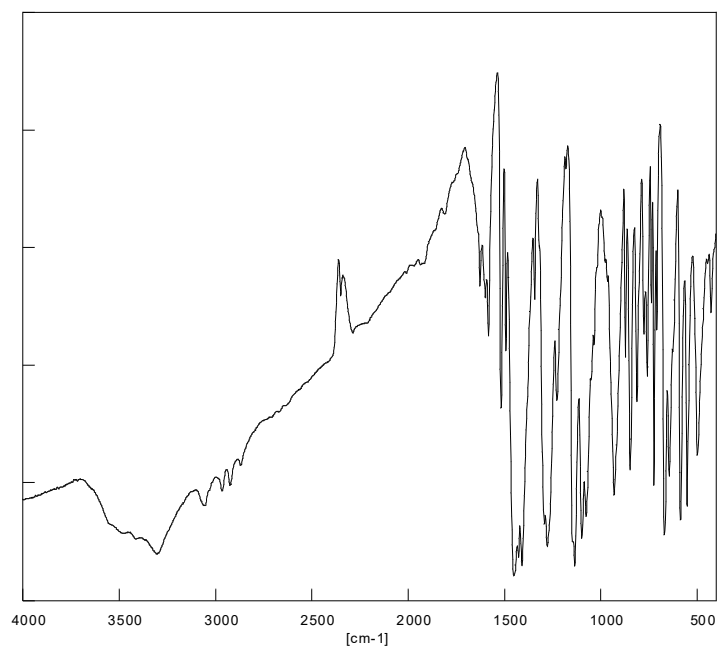

**Figure S3.** IR spectrum of the C2 complex.

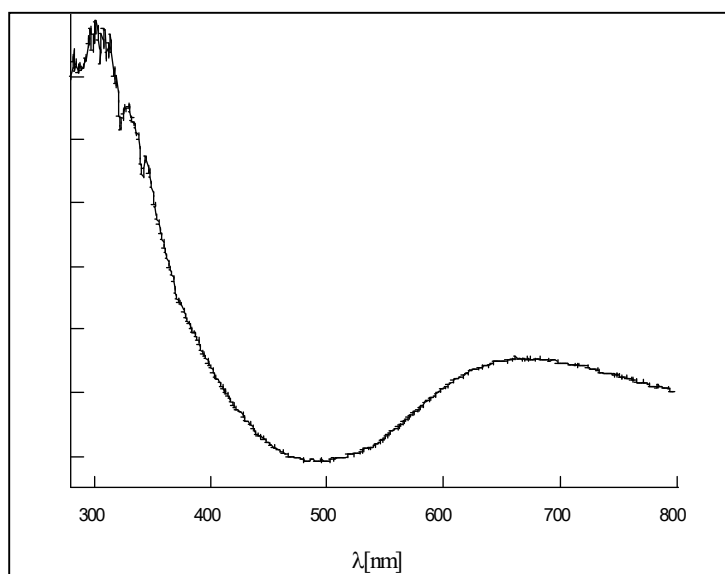

**Figure S4.** Diffuse UV-Vis reflection spectrum of the C2 complex.
